# Supplementary material
Source: MDPI journal article supplement (https://www.mdpi.com/2073-4441/10/7/818)
Supplement: s1 [file s1]

**Supplementary data for**

**Efficient Low-Cost Anaerobic Treatment of  
Wastewater Using Biochar and Woodchip Filters**

Korbinian Kaetzel\*, Manfred Lübken, Tito Gehring and Marc Wichern

Institute of Urban Water Management and Environmental Engineering,  
Ruhr-Universität Bochum, Universitätsstraße 150, 44780 Bochum, Germany

\*To whom correspondence should be addressed.

E-Mail: [korbinian.kaetzel@rub.de](mailto:korbinian.kaetzel@rub.de)

Phone: +49 234 32 26105

Fax: +49 234 32 14503

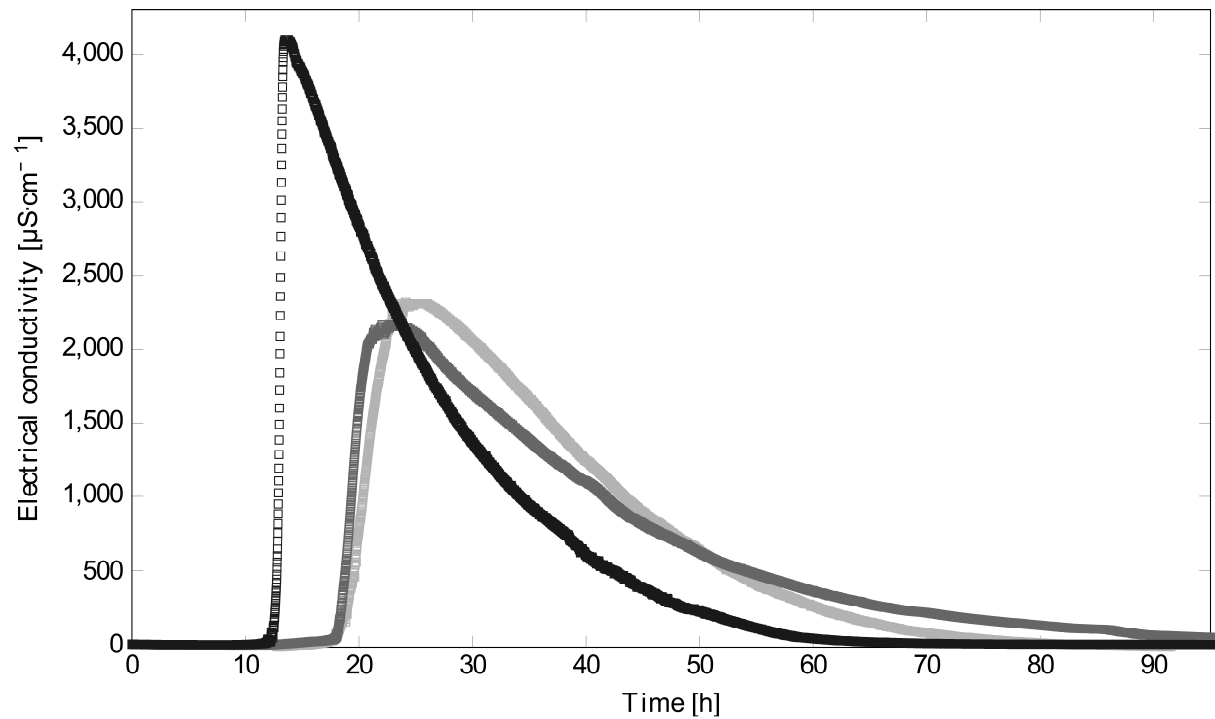

**Figure S1.** Electrical conductivity over time of effluents from different filter units after adding a pulse of NaCl to influent tap water. Hydraulic loading rate of filters, gravel (black), biochar (grey) and woodchips (light grey) was  $0.05 \text{ m} \cdot \text{h}^{-1}$ .

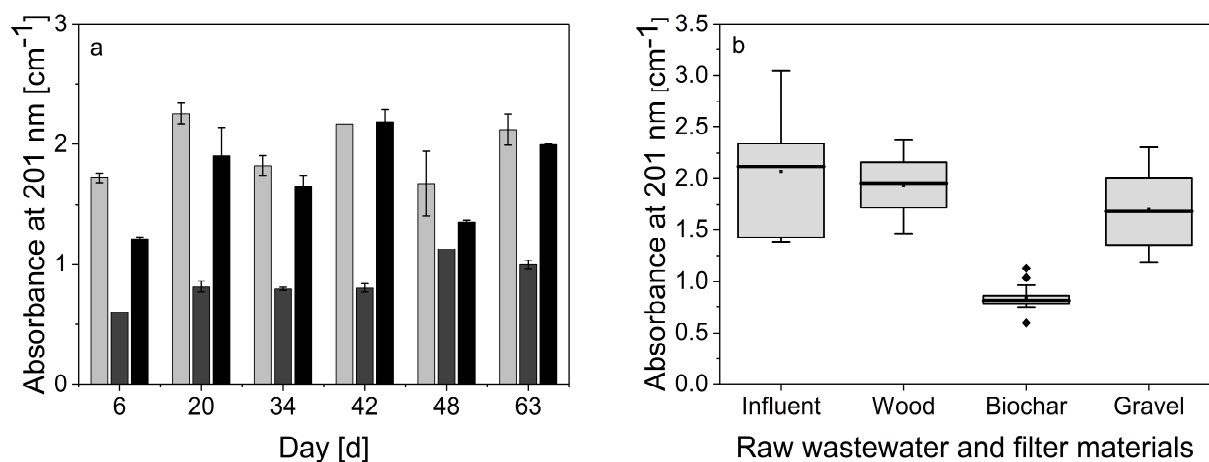

**Figure S2.** Mean UV-Extinction of filter effluents at 201 nm (a) of gravel (black), biochar (grey) and woodchips (light grey) over time. Error bars represents standard deviation. Boxplot of UV-Absorbance at 201 nm of filter effluent and raw water (b).

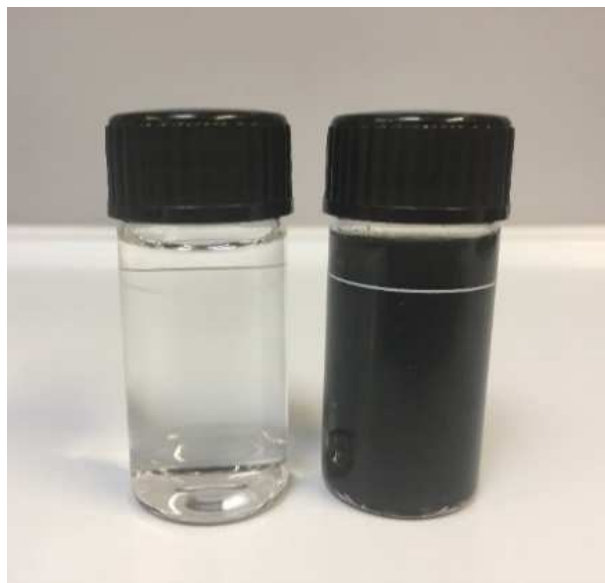

**Figure S3.** Samples of filter influent (right) and effluent of biochar filter (left).

**Table S1.** Chemical and physical characteristics of biochar and woodchips. Standard deviations are presented as variation range.

| Parameter                   | Unit                           | Biochar          | Woodchips        |
|-----------------------------|--------------------------------|------------------|------------------|
| Specific surface area (BET) | $\text{m}^2\cdot\text{g}^{-1}$ | 485              | <1               |
| Specific surface area (BET) | $\text{m}^2\cdot\text{m}^{-3}$ | $1.11\cdot 10^8$ | $1.69\cdot 10^5$ |
| Zeta potential              | mV                             | $-20.8 \pm 0.8$  | $-13.1 \pm 1.6$  |
| Total carbon (C)            | % w·w <sup>-1</sup>            | 89.2             | 47.1             |
| Total nitrogen (N)          | % w·w <sup>-1</sup>            | 1.0              | <0.10            |
| Oxygen (O)                  | % w·w <sup>-1</sup>            | 1.9              | 37.5             |
| Hydrogen (H)                | % w·w <sup>-1</sup>            | 1.6              | 7.1              |
| Sulfur (S)                  | % w·w <sup>-1</sup>            | 0.04             | 0.031            |
| Total phosphorous (P)       | $\text{mg}\cdot\text{g}^{-1}$  | 4.3              | 1                |
| C/O                         | -                              | 46.9             | 1.26             |
| C/N                         | -                              | 89.2             | >471             |

**Table S2.** Chemical and physical characteristics of quartz gravel. Specific surface area was calculated according to Wichern et al. (2008)<sup>1</sup>. Standard deviations are presented as variation range.

| Parameter                      | Unit                           | Gravel             |
|--------------------------------|--------------------------------|--------------------|
| Specific surface area          | $\text{m}^2\cdot\text{g}^{-1}$ | < 0.001            |
| Specific surface area          | $\text{m}^2\cdot\text{m}^{-3}$ | < $1.55\cdot 10^3$ |
| Zeta potential                 | mV                             | $- 28.4 \pm 1.3$   |
| Na <sub>2</sub> O              | % w·w <sup>-1</sup>            | 0.09               |
| MgO                            | % w·w <sup>-1</sup>            | 0.02               |
| Al <sub>2</sub> O <sub>3</sub> | % w·w <sup>-1</sup>            | 1,3                |
| SiO <sub>2</sub>               | % w·w <sup>-1</sup>            | 97.6               |
| K <sub>2</sub> O               | % w·w <sup>-1</sup>            | 0.87               |
| CaO                            | % w·w <sup>-1</sup>            | 0.02               |
| TiO <sub>2</sub>               | % w·w <sup>-1</sup>            | 0,024              |
| Fe <sub>2</sub> O <sub>3</sub> | % w·w <sup>-1</sup>            | 0,067              |
| P <sub>2</sub> O <sub>5</sub>  | % w·w <sup>-1</sup>            | < 0.01             |

**Table S3.** Porosity of different filter materials and theoretical hydraulic retention time. Porosity of dried and saturated woodchips and biochar were determined. HRT was calculated from storage reservoir to sampling port.

| Material        | Porosity of fraction [%] |         |        | HRT [h] |
|-----------------|--------------------------|---------|--------|---------|
|                 | 11/16 mm                 | 8/11 mm | 5/8 mm |         |
| Gravel          | 43                       | 41.2    | 41.4   | 17.2    |
| Woodchips (dry) | 78.8                     | 78.2    | 81.4   | 28.5    |
| Woodchips (wet) | 52.1                     | 51.6    | 53.6   | 20.5    |
| Biochar (dry)   | 73.4                     | 72.4    | 73     | 26.6    |
| Biochar (wet)   | 47.8                     | 43.3    | 40.7   | 17.8    |

**Table S4.** Physical parameters of filter influent and effluent. Standard deviations are presented as variation range.

| Parameter   | Unit                | Influent   | Woodchip   | Biochar    | Gravel     |
|-------------|---------------------|------------|------------|------------|------------|
| pH          |                     | 7.8 ± 0.2  | 7.8 ± 0.3  | 7.8 ± 0.3  | 8 ± 0.2    |
| EC          | μS·cm <sup>-1</sup> | 1178 ± 166 | 1177 ± 168 | 1148 ± 154 | 1177 ± 171 |
| Temperature | °C                  | 5 ± 1      | 22 ± 1     | 22 ± 1     | 22 ± 1     |

#### References:

- 1 M. Wichern, C. Lindenblatt, M. Lübken and H. Horn, *Water Res.*, 2008, **42**, 3899–909.
